# Supplementary figures and images for: Optimization of a Molecularly Imprinted Polymer Synthesis for a Rapid Detection of Caffeic Acid in Wine
Source: MDPI journal article supplement (doi:10.3390/foods12081660), 2023-04-16

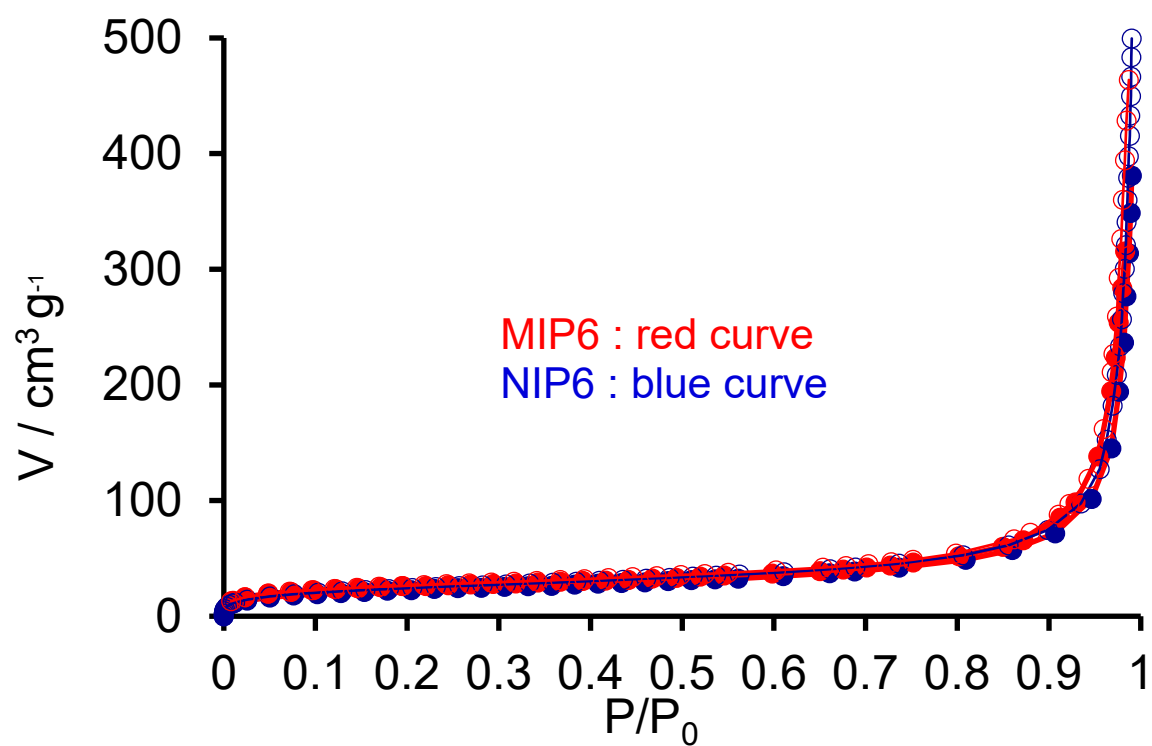

Figure S1. N<sub>2</sub> sorption isotherms of MIP6 and NIP6.

Supplement: s1 [file s1]
